# Supplementary material
Source: PubMed Central journal article supplement (PMC8821930)
Supplement: mmc1.pdf [file mmc1.pdf]

YMTHE, Volume 30

## Supplemental Information

### Targeting of pancreatic cancer cells and stromal cells using engineered oncolytic *Salmonella typhimurium*

Wenzhi Tan, Mai Thi-Quynh Duong, Chaohui Zuo, Yeshan Qin, Ying Zhang, Yanxia Guo, Yeongjin Hong, Jin Hai Zheng, and Jung-Joon Min

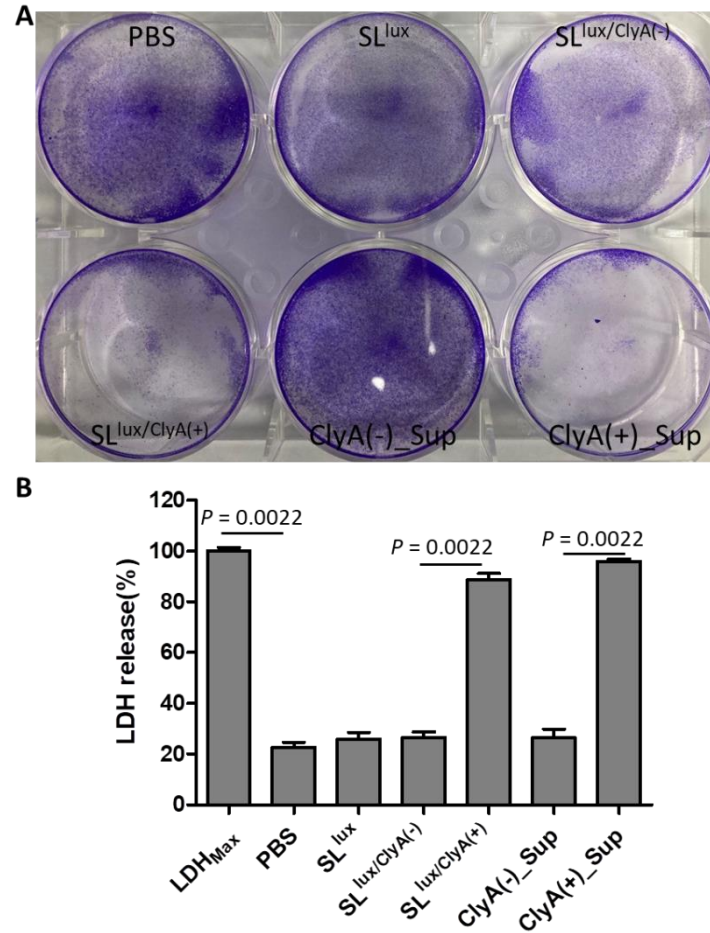

**Figure S1. In vitro cell killing of AsPC-1 by ClyA-expressing bacteria.**  $1 \times 10^6$  cell/well were seeded in a 6-well plate, and after 24 h, the cells were co-cultured with 100 MOI (multiplicity of infection, bacteria: cell = 100:1) SL<sup>lux</sup> and SL<sup>lux/ClyA</sup> with or without 8 h induction of 0.2% L-arabinose. 120  $\mu$ g/ml of gentamycin was subsequently added into the culture, and the culture was maintained for another 36 h. Bacteria culture supernatant (Sup) collected from SL<sup>lux/ClyA</sup> with or without 8 h induction of 0.2% L-arabinose was also added to the cells as shown in the last two wells at a final concentration of 15% (v/v). (A) The plate was stained with crystal violet after 36 h treatment. (B) Lactate dehydrogenase (LDH) release was measured in the cell-culture supernatant. Completely lysed cells served as the positive control (LDH<sub>Max</sub>, n = 6).

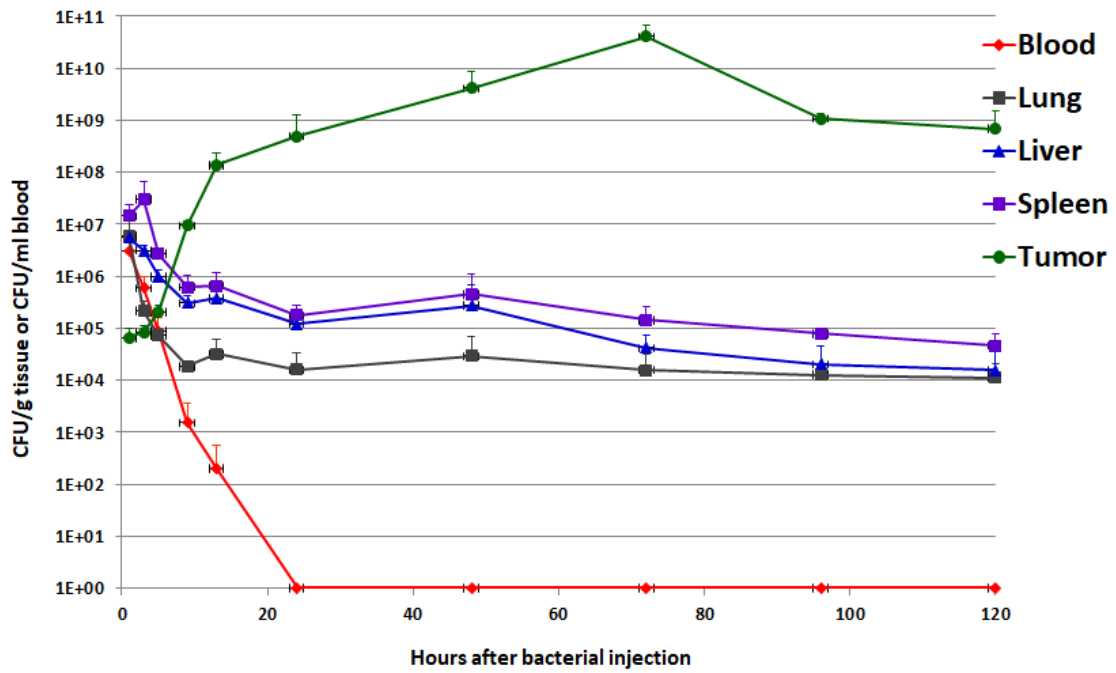

**Figure S2. Bacterial biodistribution in vivo.** Attenuated bacteria have broad and very specific targeting abilities toward various kinds of solid tumors, and the MC38 murine colon cancer in immunocompetent C57BL/6 mice was applied to. Samples were collected from MC38 tumor-bearing mice at indicated time points post-bacterial infection. Viable bacterial numbers were quantified with colony counts to study the biodistribution of attenuated *Salmonella typhimurium* (SL) in vivo (n = 11).

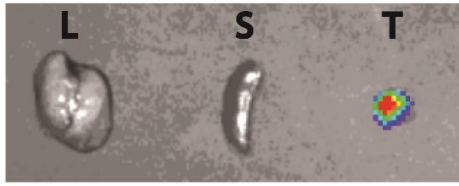

**Figure S3. Ex vivo imaging of AsPC-1 xenografts post-bacterial injection.** AsPC-1 (n = 11 mice per group) cancer model mice were treated with engineered SL<sup>lux/ClyA</sup>. When the tumor reached 100–120 mm<sup>3</sup>, mice were treated with 3.0×10<sup>7</sup> CFU engineered bacteria. Bacterial bioluminescence, as monitored by IVIS imaging, at 3 dpi. L: liver, S: spleen, T: tumor.

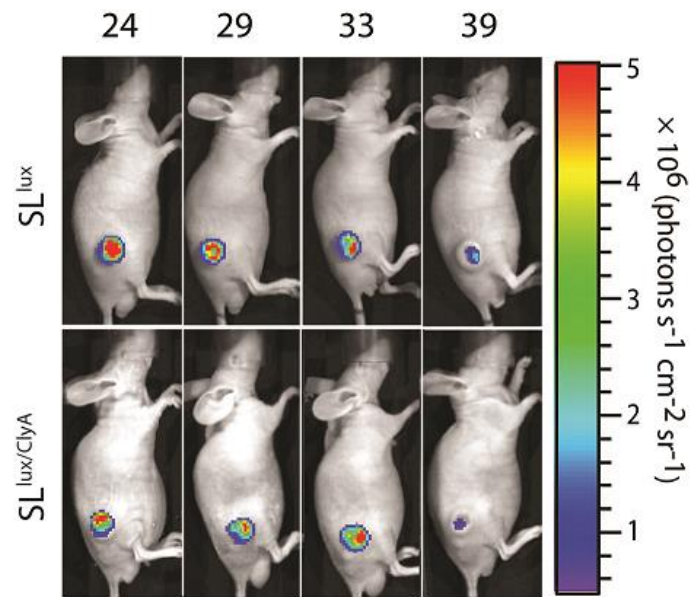

**Figure S4. Bacterial colonization of AsPC-1 subcutaneous tumors.** AsPC-1 (n = 12 mice per group) cancer model mice were treated with engineered *Salmonella*. When the tumors reached 100–120 mm<sup>3</sup>, mice were treated with  $3.0 \times 10^7$  CFU engineered  $SL^{lux}$  or  $SL^{lux/ClyA}$ . Bacterial bioluminescence, as monitored by IVIS imaging, in a representative mouse from each group.

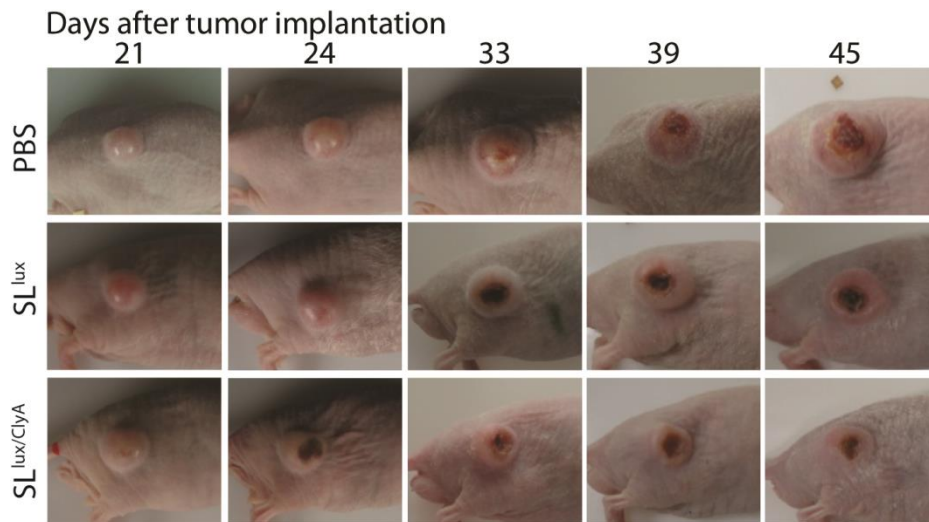

**Figure S5. Photographs of representative AsPC-1 cancer model mice.** AsPC-1 (n = 12 mice per group) cancer model mice were treated with PBS, engineered SL<sup>lux</sup>, or SL<sup>lux/ClyA</sup>. When the tumor reached 100–120 mm<sup>3</sup>, mice were treated with 3.0×10<sup>7</sup> CFU engineered bacteria. Representative photos from each group are shown.

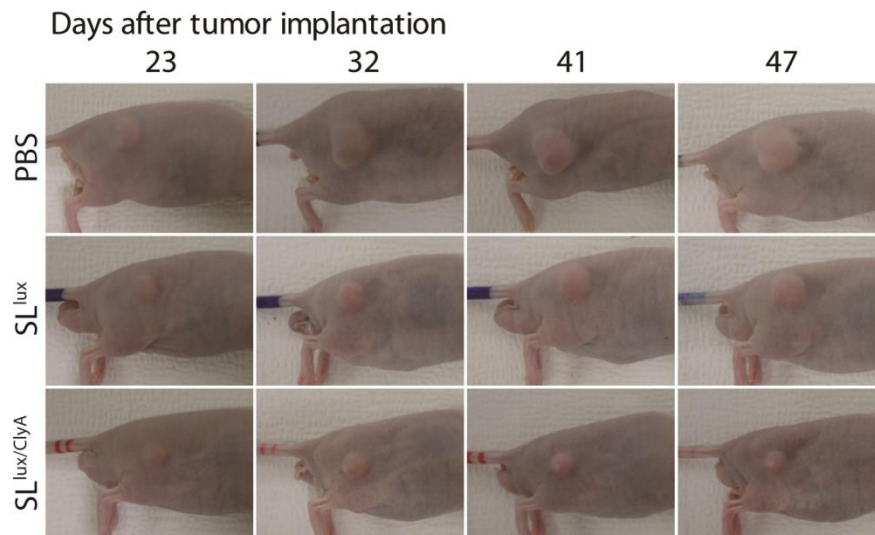

**Figure S6. Photographs of representative Capan-2 cancer model mice.** Capan-2 (n = 10 mice per group) cancer model mice were treated with PBS, engineered SL<sup>lux</sup>, or SL<sup>lux/ClyA</sup>. When the tumor reached 100–120 mm<sup>3</sup>, mice were treated with 3.0×10<sup>7</sup> CFU engineered bacteria. Representative photos from each group are shown.

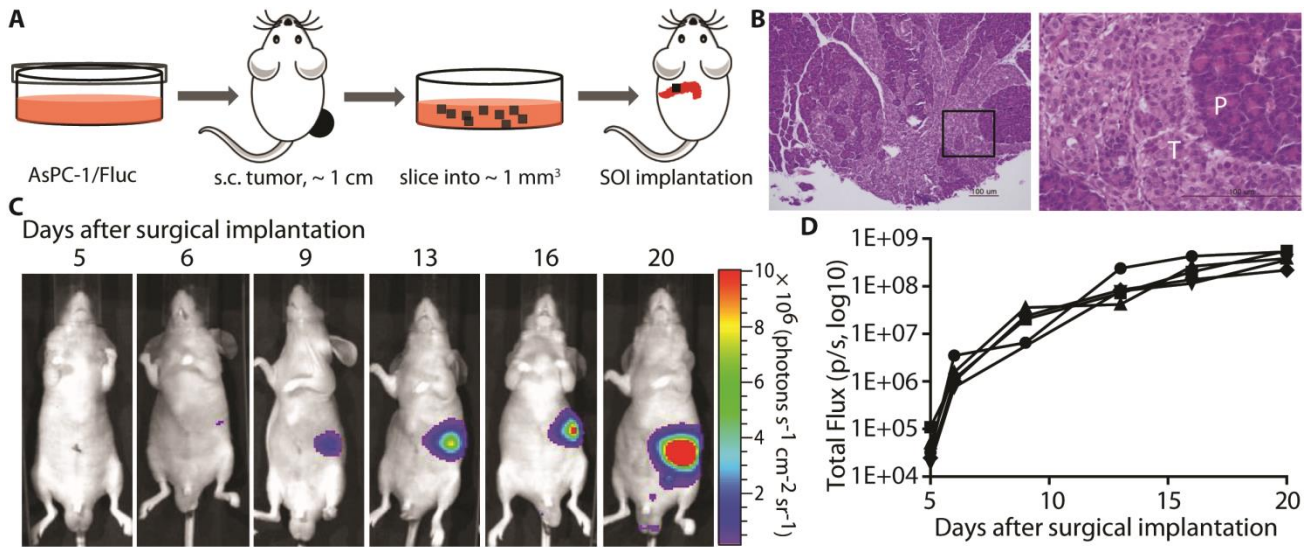

**Figure S7. Generation of an orthotopic pancreatic cancer model in nude mice.** (A) Schematic showing the generation of an orthotopic pancreatic cancer model. (B) Confirmation of local tumor invasion (Day 11) into normal pancreatic tissue (H&E staining; n = 6 mice). Scale bar = 100 μm. (C) Representative bioluminescence images showing developmental dynamics of orthotopic pancreatic cancer (AsPC-1/Fluc), as monitored by IVIS. (D) Changes in tumor total Flux in individual mouse (n = 5).



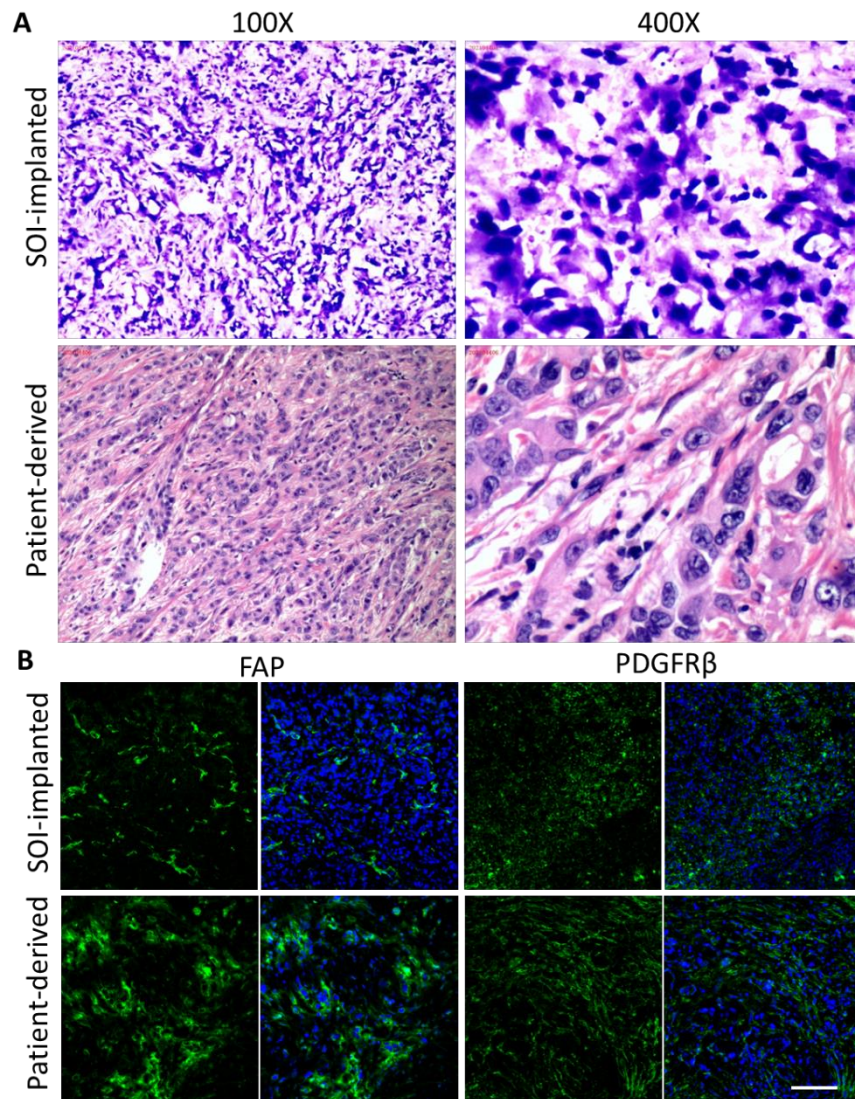

**Figure S8. Comparison of the orthotopic PDAC and patient-derived pancreatic cancer tissues.**

(A) SOI-implanted model showed similar poorly differentiated pancreatic adenocarcinoma structure resembling clinical PDAC, as clarified by a pathologist in Hunan Cancer Hospital. SOI-implanted tumors were prepared in OCT block, whereas the patient-derived cancer tissues were processed in paraffin blocks, which displayed good morphology. (B) Contiguous sections were stained with fibroblast activation protein (FAP) or platelet-derived growth factor receptor  $\beta$  (PDGFR- $\beta$ ) antibody, and nuclei were stained with DAPI (blue), scale bar = 100  $\mu$ m.

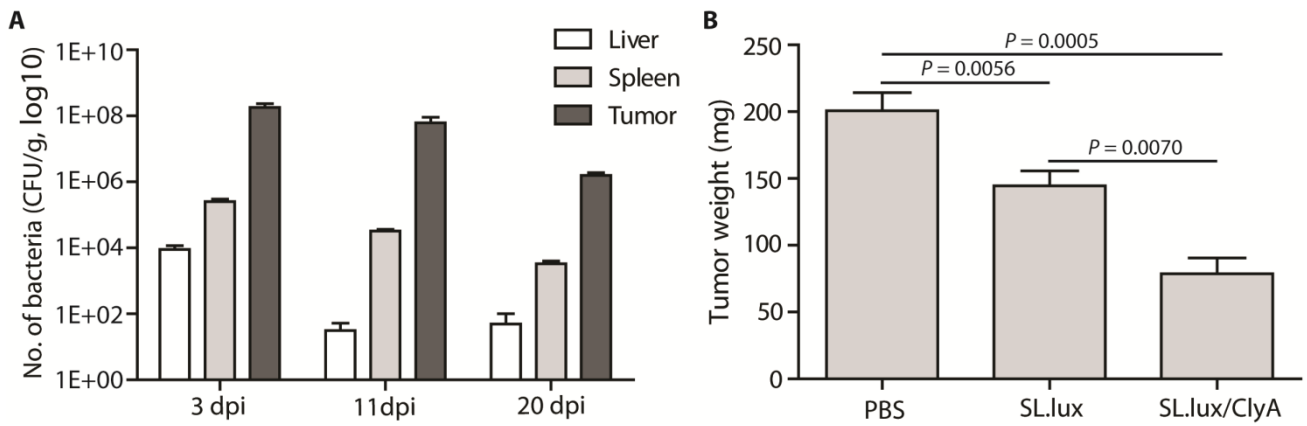

**Figure S9. Anticancer activity in the orthotopic pancreatic cancer model.** Mice harboring SOI-implanted cancer fragments (AsPC-1/Fluc) were injected intravenously with  $3.0 \times 10^7$  CFU engineered  $SL^{lux}$ ,  $SL^{lux/ClyA}$ , or PBS. (A) Quantification of bacteria in the liver, spleen, and tumor at 3, 11, and 20 days post-bacterial infection ( $n = 8$  mice per group for each time point). (B) Primary tumor weight at Day 22 post-surgical implantation (7 dpi;  $n = 9$  mice per group).

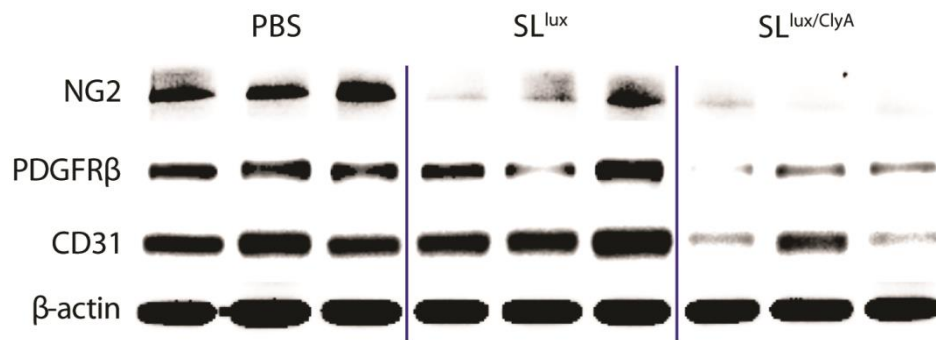

**Figure S10. Stromal cell changes after treatment with ClyA-expressing bacteria.** Samples were collected at 5 days post-bacterial infection ( $3.0 \times 10^7$  CFU, 48 hours after ClyA induction) from AsPC-1 mice. Expression of stromal cell markers was examined by Western blot analysis. NG2: Neural/glial antigen 2; PDGFR $\beta$ : Platelet-derived growth factor receptor  $\beta$ ; CD31: Cluster of differentiation 31. Data are representative of at least two independent experiments.

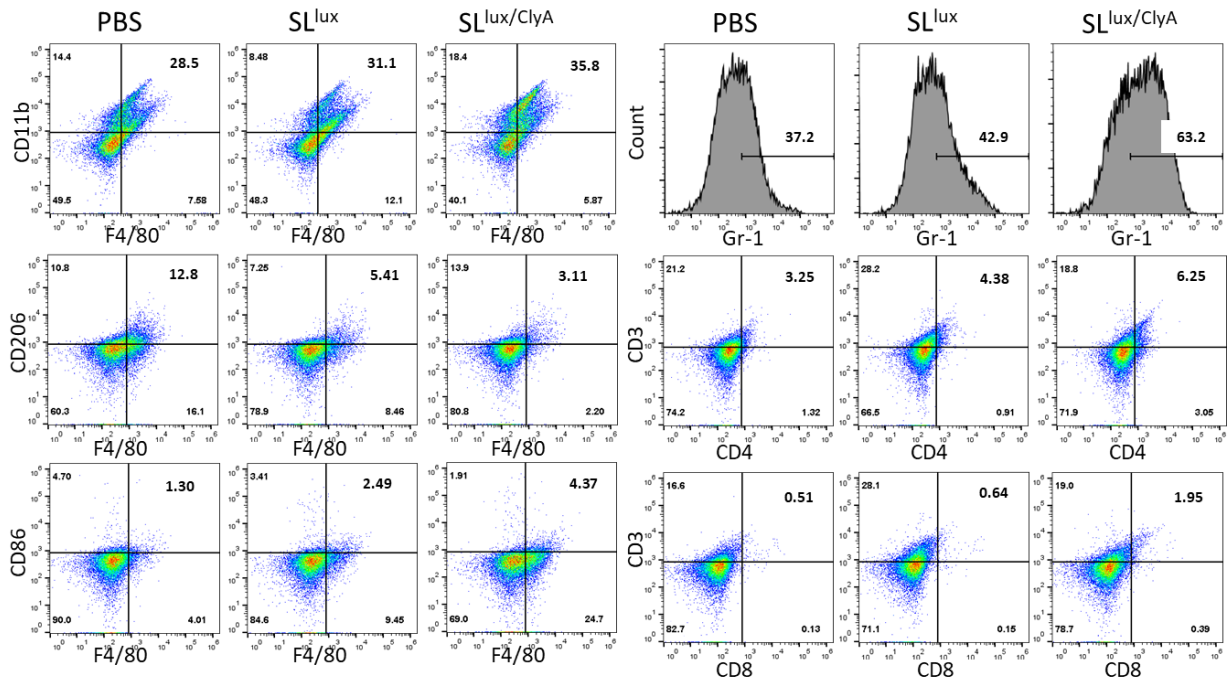

**Figure S11. Immune cell analysis in tumor microenvironments.** Single-cell suspensions from Pan02 tumors were prepared by incubating removed tumor pieces in 1.0 mg/ml collagenase D (Roche) and 50  $\mu$ g/ml DNase I (Roche) for 45 min at 37 C, followed by passing through a 40  $\mu$ m cell strainer. Samples were incubated with specific fluorochrome-labeled antibodies (Table S2) at 4 C for 30 min. At least 20,000 events were analyzed using a FACSCalibur flow cytometer (BD Biosciences). Data were analyzed using FlowJo (TreeStar) software. The analysis gate was set on the basis of isotype plots. Representative data with two independent experiments (n = 3). Macrophage, CD11b<sup>+</sup>F4/80<sup>+</sup>; M2-type macrophage, F4/80<sup>+</sup> CD206<sup>+</sup>; M1-type macrophage, F4/80<sup>+</sup> CD86<sup>+</sup>; Neutrophil, Gr-1<sup>+</sup>; CD4<sup>+</sup> T cell, CD3<sup>+</sup>CD4<sup>+</sup>; CD8<sup>+</sup> T cell, CD3<sup>+</sup>CD8a<sup>+</sup>.

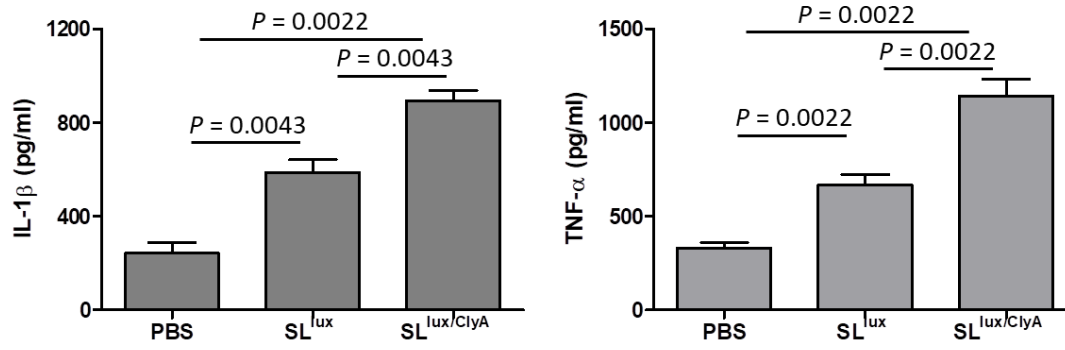

**Figure S12. Detection of inflammatory cytokines in tumor tissues.** Tumor tissues (n = 6 mice/group) were isolated from Pan02 tumor-bearing mice at 48 h after L-arabinose induction on day 5 post-bacterial infection. Cytokines were detected with IL-1 $\beta$  and TNF- $\alpha$  ELISA kits (eBioscience).

**Table S1. Bacterial strains and plasmids used in the study**

| Strains/plasmids                                                 | Relevant genotype                       | Reference | Injection dose              |
|------------------------------------------------------------------|-----------------------------------------|-----------|-----------------------------|
| <i>S. typhimurium</i> $\Delta$ ppGpp (SL)                        | $\Delta relA, \Delta spoT$              | 24        | $1.0 \times 10^7$ CFU/mouse |
| <i>S. typhimurium</i> $\Delta$ ppGpp lux<br>(SL <sup>lux</sup> ) | $\Delta relA, \Delta spoT$ , lux operon | 28        | $3.0 \times 10^7$ CFU/mouse |
| pBAD-Empty                                                       | Control vector                          | 15        |                             |
| pBAD-ClyA                                                        | ClyA-encoding                           | 28        |                             |

CFU: colony-forming units.

**Table S2. Antibodies used in the study**

| <b>Antibody name</b>                                               | <b>Antibody description</b>      | <b>Company/Catalog no.</b>              | <b>Remark</b>       |
|--------------------------------------------------------------------|----------------------------------|-----------------------------------------|---------------------|
| Rabbit anti-ClyA polyclonal antibody                               | Rabbit anti-ClyA                 | Yeongjin Hong<br>Chonnam National Univ. | <b>Primary Ab</b>   |
| Goat anti- <i>Salmonella</i> polyclonal antibody                   | Anti- <i>Salmonella</i>          | GenWay Biotech/<br>GWB-AB2632           |                     |
| $\beta$ -actin (C4)                                                | Mouse anti- $\beta$ -actin       | Santa Cruz Biotechnology<br>/SC-47778   |                     |
| Rabbit anti-NG2 chondroitin sulfate<br>proteoglycan                | Rabbit anti-NG2                  | Millipore /AB5320                       |                     |
| Anti-PDGFR receptor beta antibody                                  | Rabbit anti-PDGFR $\beta$        | Abcam/ab32570                           |                     |
| Anti-CD31 antibody                                                 | Rabbit anti-CD31                 | Abcam/ab28364                           |                     |
| Rat anti-mouse F4/80 (A3-1)                                        | Rat anti-mouse F4/80             | AbD Serotec/MCA497GA                    |                     |
| Neutrophil marker (6A608)                                          | Rat mAb anti-mouse<br>neutrophil | Santa Cruz Biotechnology<br>/SC-71674   |                     |
| Anti-CD4 antibody                                                  | Rat mAb anti-mouse CD4           | Invitrogen/14-0041                      |                     |
| Anti-CD8a antibody                                                 | Rat mAb anti-mouse CD8a          | Invitrogen/14-0081                      |                     |
| FAP polyclonal antibody                                            | Rabbit anti-FAP                  | Invitrogen/PA5-99458                    |                     |
| PDGFR $\beta$ monoclonal antibody (G.290.3)                        | Rabbit anti-PDGFR $\beta$        | Invitrogen/MA5-15143                    |                     |
| Peroxidase-conjugated rabbit anti-mouse<br>immunoglobulin          | Rabbit anti-mouse                | Dako/P0260                              | <b>Secondary Ab</b> |
| Peroxidase-conjugated goat anti-Armenian<br>hamster immunoglobulin | Goat anti-hamster                | Santa Cruz Biotechnology<br>/SC-2443    |                     |
| Peroxidase-conjugated goat anti-rabbit<br>immunoglobulin           | Goat anti-rabbit                 | Dako/P0448                              |                     |
| Alexa Fluor® 488 donkey anti-rat IgG (H+L)<br>antibody             | Donkey anti-rat                  | Invitrogen/A21208                       |                     |
| Alexa Fluor® 555 donkey anti-rabbit IgG (H+L)<br>antibody          | Donkey anti-rabbit               | Invitrogen/A31572                       |                     |
| Alexa Fluor® 488 donkey anti-rabbit IgG (H+L)<br>antibody          | Donkey anti-rabbit               | Invitrogen/A-21206                      |                     |
| Anti-mouse CD45 FITC                                               | mAb (clone 30-F11)               | eBioscience/11-0451                     | <b>FACS Ab</b>      |
| Anti-mouse CD11b FITC                                              | mAb (clone M1/70)                | eBioscience/11-0112                     |                     |
| Anti-mouse F4/80 antigen PE                                        | mAb (clone BM8)                  | Biolegend/123110                        |                     |
| Anti-mouse CD3 APC                                                 | mAb (clone 17A2)                 | eBioscience/17-0032                     |                     |
| Anti-mouse CD4 FITC                                                | mAb (clone GK1.5)                | eBioscience/11-0041                     |                     |
| Anti-mouse CD8a FITC                                               | mAb (clone 53-6.7)               | eBioscience/12-0081                     |                     |
| Anti-mouse Ly-6G (Gr-1) PE                                         | mAb (clone RB6-8C5)              | eBioscience/12-5931                     |                     |
| Anti-mouse CD86 (B7-2) APC                                         | mAb (clone GL1)                  | eBioscience/17-0862                     |                     |
| APC anti-mouse CD206 (MMR)                                         | mAb (clone C068C2)               | BioLegend/141708                        |                     |
